# Supplementary material
Source: HighWire-hosted journal article supplement (https://www.cmaj.ca/highwire/filestream/148899/field_highwire_adjunct_files/5/221512-res-6-at.pdf)
Supplement: 221512-res-6-at.pdf [file 221512-res-6-at.pdf]

**Supplementary Table 5:** Unadjusted and Adjusted hazard ratios of all-cause mortality, and sub-distribution hazard ratios for cancer-specific mortality, for patients diagnosed during 2019 and 2020<sup>1</sup>

|                                        | Bladder           | Breast            | Cervix            | Colorectal        | Kidney            | Lung              | Melanoma          | NHL               | Prostate          | Uterus            |
|----------------------------------------|-------------------|-------------------|-------------------|-------------------|-------------------|-------------------|-------------------|-------------------|-------------------|-------------------|
| <i>Unadjusted HR<sup>2</sup></i>       |                   |                   |                   |                   |                   |                   |                   |                   |                   |                   |
| 2019 cohort <sup>5</sup>               | 0.94 (0.73, 1.22) | 0.98 (0.75, 1.28) | 1.65 (0.77, 3.56) | 0.87 (0.76, 1.00) | 1.14 (0.83, 1.56) | 0.99 (0.91, 1.07) | 1.12 (0.73, 1.71) | 1.03 (0.83, 1.29) | 1.18 (0.90, 1.54) | 1.00 (0.69, 1.46) |
| 2020 cohort <sup>6</sup>               | 0.77 (0.56, 1.04) | 0.93 (0.69, 1.27) | 0.81 (0.30, 2.20) | 1.24 (1.08, 1.43) | 1.18 (0.83, 1.68) | 1.05 (0.96, 1.14) | 1.17 (0.72, 1.90) | 1.43 (1.14, 1.78) | 1.32 (0.98, 1.78) | 1.27 (0.87, 1.87) |
| <i>Adjusted HR<sup>3</sup></i>         |                   |                   |                   |                   |                   |                   |                   |                   |                   |                   |
| 2019 cohort                            | 0.96 (0.74, 1.25) | 0.96 (0.73, 1.25) | 1.54 (0.71, 3.35) | 0.90 (0.79, 1.04) | 1.22 (0.89, 1.68) | 0.94 (0.87, 1.02) | 1.29 (0.84, 1.98) | 1.03 (0.83, 1.29) | 1.07 (0.81, 1.40) | 1.20 (0.82, 1.76) |
| 2020 cohort                            | 0.86 (0.63, 1.17) | 0.87 (0.64, 1.18) | 0.57 (0.21, 1.59) | 1.21 (1.05, 1.40) | 1.06 (0.74, 1.52) | 1.03 (0.95, 1.13) | 1.23 (0.76, 2.00) | 1.43 (1.14, 1.79) | 1.13 (0.84, 1.51) | 1.57 (1.06, 2.33) |
| <i>Sub-distribution HR<sup>4</sup></i> |                   |                   |                   |                   |                   |                   |                   |                   |                   |                   |
| 2019 cohort                            | 1.00 (0.75, 1.34) | 0.91 (0.67, 1.24) | 1.55 (0.69, 3.49) | 0.92 (0.79, 1.06) | 1.30 (0.89, 1.90) | 0.94 (0.87, 1.02) | 1.69 (1.01, 2.84) | 0.96 (0.76, 1.23) | 0.97 (0.71, 1.33) | 1.19 (0.79, 1.78) |
| 2020 cohort                            | 0.95 (0.68, 1.34) | 0.87 (0.61, 1.23) | 0.38 (0.12, 1.25) | 1.18 (1.01, 1.38) | 0.99 (0.65, 1.51) | 1.05 (0.96, 1.15) | 1.55 (0.86, 2.78) | 1.40 (1.11, 1.78) | 1.01 (0.71, 1.42) | 1.54 (1.02, 2.30) |

1: All results were in contrast to the referent group, which were patients diagnosed between Jan 16, 2018 and Mar 15, 2019

2: Hazard ratios were estimated from a univariable Cox regression model

3: Hazard ratios were estimated from a multivariable Cox regression model adjusting for age, sex, residence (urban vs rural), and stage at diagnosis

4: Hazard ratios were estimated from a Fine-Gray model for cancer-specific death, with competing risk of non-cancer related death.

5: The 2019 cohort referred to patients diagnosed between Mar 16, 2019 and Mar 15, 2020.

6: The 2020 cohort referred to patients diagnosed between Mar 16, 2020 and Dec 15, 2020.
